# Supplementary material
Source: PubMed Central journal article supplement (PMC7725892)
Supplement: NIHMS1634150-supplement-2.pdf [file NIHMS1634150-supplement-2.pdf]

1 **Table S1:** Data set summary and patient characteristics. HCT-graft types: TCD: T-cell depleted graft (*ex-vivo*)  
 2 by CD34+selection; PBSC: peripheral blood stem cells; BM: bone marrow; cord: umbilical cord blood;  
 3 Conditioning intensity: Bacigalupo classification, graded categories from most to least intense (ABLATIVE,  
 4 REDUCE, NONABL).

5

|                               |                                     |         |
|-------------------------------|-------------------------------------|---------|
| <b>patients</b>               |                                     | 2,926   |
| <b>HCT therapies*</b>         |                                     | 3,060   |
| <b>blood samples</b>          | total                               | 450,635 |
|                               | between HCT-day -21 and HCT-day 183 | 193,396 |
| <b>Disease</b>                | Leukemia                            | 1,635   |
|                               | Non-Hodgkin's Lymphoma              | 415     |
|                               | Multiple Myeloma                    | 170     |
|                               | Hodgkin's disease                   | 88      |
|                               | other                               | 752     |
| <b>HCT graft type</b>         | TCD                                 | 1,106   |
|                               | PBSC unmodified                     | 959     |
|                               | BM unmodified                       | 617     |
|                               | cord                                | 378     |
| <b>Conditioning intensity</b> | ABLATIVE                            | 65%     |
|                               | REDUCE                              | 21%     |
|                               | NONABL                              | 13%     |
| <b>Gender</b>                 | M                                   | 58%     |
|                               | F                                   | 42%     |
| <b>Age of adults (years)</b>  | 25%-tile                            | 39      |
|                               | mean                                | 50      |
|                               | 75%-tile                            | 62      |
| <b>Microbiome samples</b>     | total                               | 12,633  |
|                               | - from patients with blood data     | 10,680  |
|                               | - of those, post engraftment        | 4,179   |
|                               | - of those with daily change in WBC | 2,615   |
|                               | patients with microbiome sample     | 1,290   |

6 \*) some patient received several HCTs

7

8 **Table S2:** Patient and HCT characteristics of 24 patients enrolled in the randomized controlled FMT trial.

|                        | <b>control</b> | <b>FMT treated</b> |
|------------------------|----------------|--------------------|
| <b>N patients</b>      | 10             | 14                 |
| <b>ABLATIVE</b>        | 6              | 7                  |
| <b>REDUCE</b>          | 4              | 7                  |
| <b>BM unmodified</b>   | 1              | 3                  |
| <b>PBSC unmodified</b> | 3              | 4                  |
| <b>TCD</b>             | 5              | 3                  |
| <b>cord</b>            | 1              | 4                  |

9

10

11

12

13 **Table S3:** Patient and HCT characteristics of the subset of patients who did not donate microbiota samples.

|                               |                        |                  |
|-------------------------------|------------------------|------------------|
| <b>patients</b>               |                        | 1,010            |
| <b>Disease distribution</b>   | Leukemia               | 53%              |
|                               | Non-Hodgkin's Lymphoma | 17%              |
|                               | Multiple Myeloma       | 5%               |
|                               | Hodgkin's disease      | 5%               |
|                               | other                  | 20%              |
| <b>HCT graft type</b>         | TCD                    | 40% <sup>o</sup> |
|                               | PBSC unmodified        | 31%              |
|                               | BM unmodified          | 17%              |
|                               | cord                   | 12%              |
| <b>Conditioning intensity</b> | ABLATIVE               | 65%              |
|                               | REDUCE                 | 14%              |
|                               | NONABL                 | 21%              |
| <b>Gender</b>                 | M                      | 58%              |
|                               | F                      | 42%              |
| <b>Age (years)</b>            | 25%-tile               | 36               |
|                               | mean                   | 47               |
|                               | 75%-tile               | 59               |

14

15 **Table S4:** Patient and HCT characteristics of the subset of patients who donated microbiota samples.

|                               |                        |       |
|-------------------------------|------------------------|-------|
| <b>patients</b>               |                        | 1,294 |
| <b>Disease distribution</b>   | Leukemia               | 51%   |
|                               | Non-Hodgkin's Lymphoma | 15%   |
|                               | Multiple Myeloma       | 8%    |
|                               | Hodgkin's disease      | 3%    |
|                               | other                  | 23%   |
| <b>HCT graft type</b>         | TCD                    | 37%   |
|                               | PBSC unmodified        | 38%   |
|                               | BM unmodified          | 9%    |
|                               | cord                   | 16%   |
| <b>Conditioning intensity</b> | ABLATIVE               | 55%   |
|                               | REDUCE                 | 34%   |
|                               | NONABL                 | 11%   |
| <b>Gender</b>                 | M                      | 59%   |
|                               | F                      | 41%   |
| <b>Age (years)</b>            | 25%-tile               | 46    |
|                               | mean                   | 54    |
|                               | 75%-tile               | 65    |

16

17

18

19

20

21

22 **Table S5:** Patient and HCT characteristics of the Duke University patient cohort.

|                               |                        |     |
|-------------------------------|------------------------|-----|
| <b>patients</b>               |                        | 493 |
| <b>Disease distribution</b>   | Lymphoma               | 11% |
|                               | Leukemia               | 50% |
|                               | Non-Hodgkin's Lymphoma | 4%  |
|                               | Multiple Myeloma       | 8%  |
|                               | Hodgkin's disease      | 4%  |
|                               | other                  | 24% |
| <b>HCT graft type</b>         | TCD                    | 0%  |
|                               | PBSC unmodified        | 72% |
|                               | BM unmodified          | 11% |
|                               | cord                   | 16% |
| <b>Conditioning intensity</b> | ABLATIVE               | 92% |
|                               | NONABL                 | 7%  |
| <b>Gender</b>                 | M                      | 65% |
|                               | F                      | 35% |
| <b>Age (years)</b>            | 25%-tile               | 41  |
|                               | mean                   | 49  |
|                               | 75%-tile               | 57  |

23

## 24 **Supplementary methods and results**

### 25 **FMT procedure**

26 Patient sample collection protocols were approved by the Memorial Sloan Kettering Cancer Center  
 27 Institutional Review and Privacy Board (ClinicalTrials.gov identifier: NCT02269150) and described  
 28 in full in the original publication. Briefly, patients' stool was collected when they first entered the  
 29 clinic. We chose autologous, as opposed to feces from a heterologous donor, because of potential  
 30 safety concerns. The stool was tested for the presence of potential intestinal pathogens including *C.*  
 31 *difficile* and frozen ( $-80^{\circ}\text{C}$ ). If a patient was randomized to receive treatment after engraftment of  
 32 neutrophils, the thawed sample was re-administered via an enema. Due to the strenuous nature of this  
 33 procedure, it was deemed unethical to administer a mock enema to control patients. Subjects whose  
 34 pre-allo-HSCT feces demonstrated low microbial diversity (IS index  $< 2.0$ ) or tested positive for the  
 35 presence of an intestinal pathogen, for example, *C. difficile*, were excluded from randomization. After  
 36 successful hematopoietic cell engraftment (three consecutive blood neutrophil counts  $\geq 500$  per  $\text{mm}^3$ ),  
 37 subjects underwent testing of a fecal specimen collected after engraftment to determine the presence  
 38 of the Bacteroidetes phylum via quantitative PCR. Individuals with low abundance of Bacteroidetes  
 39 ( $< 0.1\%$  total 16S) were eligible to proceed to randomization and treatment. Eligible subjects were 1:1  
 40 randomized to undergo auto-FMT with the subject's stored pre-allo-HSCT feces versus no fecal  
 41 transplantation. Randomization was stratified by cord blood source versus non-cord blood source.  
 42 Subjects could be randomized within a 28-day window after engraftment. Subjects who were  
 43 critically ill or required prolonged microbiota-perturbing antibiotics through the designated 28-day  
 44 period were excluded from randomization.

45  
46  
47  
48  
49  
50  
51  
52  
53  
54  
55  
56  
57  
58  
59  
60  
61  
62  
63  
64  
65  
66  
67  
68  
69  
70  
71  
72  
73

**Alternative analysis of FMT effect on white blood cell counts**

In the main text we considered a random effect per day post neutrophil engraftment. Our choice of modeling day\_i as a random intercept term was to allow the cell counts to follow any function of day post FMT. Alternatively, we conducted another analysis now with day as a linear predictor:

$$y_{ij} = \beta_0 + day + arm_{post} * FMT_{ij} + patient_j + \epsilon_{ij}, \quad i = 0, \dots, D, j = 1, \dots, P,$$

This reduced significance but did not alter our main conclusions: FMT associated with increased neutrophils (coefficient FMT: 1.44, p=0.002), lymphocyte (coefficient FMT: 0.08, p=0.13), and monocytes (coefficient FMT: 0.34, p<0.001).

**Survival analysis**

We sought to analyze 3-year survival following neutrophil engraftment in the patient cohort analyzed in our main analyses. We observed 668 deaths during that period (see Kaplan Meier plot Extended Data Fig. 10). We used a Cox proportional hazards model to analyze 3-year patient survival following neutrophil engraftment using the lifelines (v0.24) package for the Python programming language (DOI:10.5281/zenodo.3677104).

$$h(t) = h_0(t) \exp (b_1 X_1 + b_2 X_2 + \dots + b_n X_n )$$

where h(t) is the expected hazard at time t, h<sub>0</sub>(t) is the baseline hazard. As predictors, X, we included the median total white blood cell count during the first 100 days following the time when FMT was usually performed (i.e. 37 days after neutrophil engraftment), sex, and age removing patients who lacked sufficient blood data during this post-engraftment period. Disease and stem cell graft source were used to stratify patients (using the “strata” parameter of the Cox proportional hazard fit function), as including them in the form of intercept terms violated the proportional hazards assumptions. This showed a mild but detectable association of total white blood cell counts during the investigated interval with improved survival:

|                                    |         |                         |           |            |            |         |
|------------------------------------|---------|-------------------------|-----------|------------|------------|---------|
|                                    | N:      | 2,013                   |           |            |            |         |
|                                    | events: | 668                     |           |            |            |         |
|                                    | strata: | 'disease', 'hct-source' |           |            |            |         |
|                                    |         | coef                    | exp(coef) | lower 0.95 | upper 0.95 | p-value |
| average total wbc count (z-scored) |         | -0.09                   | 0.91      | -0.18      | 0          | 0.04    |
| age (z-scored)                     |         | 0.19                    | 1.21      | 0.1        | 0.28       | <0.005  |
| SEX:F                              |         | 0.03                    | 1.03      | -0.12      | 0.19       | 0.68    |

## 74 **Dynamic systems analyses**

75 To investigate if the composition of the gut microbiota is associated with the dynamics of circulating  
76 white blood cells, we analyzed detailed blood and clinical metadata of HCT patients between 3 days  
77 before HCT and until 100 days post neutrophil engraftment. The blood of each patient is monitored  
78 throughout this therapy, and medications are administered to modulate the immune cell dynamics,  
79 including GCSF (Fig. 1) to increase neutrophil counts, and immunosuppressants such as  
80 mycophenolate mofetil or tacrolimus to prevent complications such as graft-vs-host disease. During  
81 this period, patients are monitored carefully, and our analysis included on average 63 longitudinal  
82 host phenotype measurements per patient in the form of complete blood counts (CBCs) which  
83 quantify the most abundant immune cells in circulation (Fig. 1, complete data description and  
84 exclusion criteria in Extended Data Fig. 1). Combining this data with detailed medication and clinical  
85 metadata—and microbiome data where available—allowed us to apply dynamic systems inference  
86 approaches on intervals during which changes in WBC counts were observed.

87

### 88 *Covariates included in interval data*

89 For a given daily interval, a medication was considered present for at least part of the interval when it  
90 was administered on either endpoint. Administration events were obtained from parsing the  
91 institutional task data base which contains drug and treatment administrations performed on patients.  
92 For the microbiota, data from the end day were considered for the interval, and for blood stream  
93 infection data, either endpoint was considered. Homeostatic feedback calculations used the geometric  
94 mean of the white blood cell counts between the two endpoints. We included only those covariates  
95 that were present during at least 10 intervals.

96 Our data comprises >1.6M recorded administrations of 806 different medications with  
97 durations provided. All patients analyzed in stage 2 had available medication records, but ~10% of the  
98 patients without microbiome data had missing medication records and/or incomplete metadata. In  
99 case of missing continuous metadata, missing values were filled with means.

100 The stem cell graft source is a major determinant of engraftment times and can affect  
101 recovery dynamics<sup>1,2</sup>, and we therefore included intercept terms for unmodified peripheral blood stem  
102 cell grafts (PBSC), bone marrow (BM), T-cell depleted graft (*ex-vivo*) by CD34+selection (TCD) and  
103 cord blood (cord) in stage 1.

104 Patients received a variety of conditioning regimens comprised of various doses of  
105 chemotherapy and, in some cases, irradiation. There are dozens of conditioning regimes for HCT<sup>3</sup>.  
106 The standard approach in the allo-HCT field for observational studies is to categorize them by the  
107 Bacigalupo classification, which uses three graded categories from most to least intense<sup>4</sup>:  
108 Myeloablative (“ABLATIVE”), Reduced Intensity (“REDUCE”), and Nonmyeloablative  
109 (“NONABL”). We included the conditioning intensity as indicator variables.

110

111 *Data exclusion for white blood cell dynamic (stage 1 and 2)*

112 Our dynamics analyses focus on the daily changes in white blood cell counts from one day to another  
113 during recovery of the circulatory immune cell system. To analyze the kinetics of this reconstitution,  
114 we excluded data when (see also flow chart below):

- 115 - On the day of HCT, patients were younger than 18 years
- 116 - Patients did not engraft
- 117 - Patients had a second transplant within 100 days
- 118 - Samples were taken outside the window of 100 days starting from neutrophil engraftment
- 119 - In case there were multiple blood samples per patient and day, the one closest to noon was  
120 chosen
- 121 - A patient died within the first 3 months after HCT
- 122 - A sample was taken within 1 week of FMT

123

124 This data exclusion is encoded as two separate columns in the tidy data table WBC.csv, by a Boolean  
125 indicator column named “include”, and the column “exclude\_reason” of string type (Extended Data  
126 Fig. 1). The algorithm and code for stage 1 and 2 are available online  
127 ([https://github.com/jsevo/wbcdynamics\\_microbiome/](https://github.com/jsevo/wbcdynamics_microbiome/)).

128

129 *Additional results*

130 Most of the taxa that strongly associated with white blood cell dynamics were obligate anaerobes that  
131 may affect immune homeostasis<sup>5-8</sup>. *Rothia*, was a notable exception: this aerobic genus is typically  
132 found in the oral cavity<sup>9</sup> but can become an opportunistic pathogen in immunosuppressed patients and  
133 is not known to provide metabolic functions to the host<sup>10-12</sup>.

134

135 **Shotgun sequencing data processing**

136 We removed normal optical duplicates in paired FASTQ files using the clumpify.sh tool from the  
137 BBMap package (BBMap – Bushnell B. – <https://www.sourceforge.net/projects/bbmap/>), producing a  
138 pair of deduped read files. Using the bbdduk.sh script in the BBMap package, we trimmed the right and  
139 left side of a read in a pair to Q10 using the Phred algorithm. A pair of reads was dropped if any one  
140 of them has a length shorter than 51 nucleotides after trimming. We trim 3’-end adapters using a kmer  
141 of length 31, and a shorter kmer of 9 at the other end of the read. One mismatch was allowed in this  
142 process, and we allowed adapter trimming based on pair overlap detection (which does not require  
143 known adapter sequences) using the ‘tbo’ parameter. We used the ‘tpe’ parameter to trim the pair of  
144 reads to the same length.

145

146 Removal of human contamination was done using Kneaddata with paired-end reads, employing  
147 BMTagger. The BMTagger database was built with human genome assembly GRCh38. After

148 decontamination, the paired-end reads were concatenated to a single FASTQ file as the input for  
149 functional profiling with the Humann2 pipeline (main methods).

150

### 151 **Rationale for using estimations of total bacterial abundances for bi-directional analysis of** 152 **bacterial and white blood cell dynamics**

153 In order to assess the association of bacterial populations with antibiotics, the ecosystem of other  
154 bacteria and the count of white blood cells in circulation, we employed a similar approach to that used  
155 in stage 1. To calculate the dependent variable, i.e. the log-changes per day in total counts, we had to  
156 estimate the absolute abundances of bacteria. This is needed because inferences of dynamic equations  
157 like the ones used here cannot be conducted on observations of changes in relative abundances.

158 Briefly, a positive change in relative abundances of a bacterium could be due to the focal bacterium's  
159 counts increasing, that of other species' decreasing, both focal and others increasing or decreasing but  
160 the focal species faster or slower so, respectively. This means that when attempting to use  
161 observations of relative abundance changes as dependent variables to infer interactions like we do  
162 here, one would try to solve one more unknown than one has information for. Unless specific  
163 assumptions can be justified, one therefore must estimate a total count. We here do this by estimating  
164 the total population density using qPCR.

165 This is important when estimating the sign and the effect sizes of antibiotics, other bacterial  
166 species in the ecosystem or the white blood cells in circulation on the changes of a focal taxon. We do  
167 not know what aspects of the microbiota can be affected by the immune system, and it is entirely  
168 possible that the immune system evolved to "control" relative abundances to achieve microbiota  
169 homeostasis<sup>13</sup>. Yet, in order to estimate in which direction the immune system's effect operates on  
170 any one taxon, for the reasons above, we require observations of total changes per taxon.

171

### 172 **Duke data collection**

173 Data at Duke university was collected analogously to the procedures at MSKCC. Complete blood  
174 counts were assessed on the Sysmex XN, Pro00050975 platform. Clinical metadata was obtained  
175 from the Duke Enterprise Data Unified Content Explorer (DEDUCE) and Duke Adult Blood and  
176 Marrow Transplant (ABMT) data base. All sequencing was conducted at MSKCC following the same  
177 protocols.

178

179 **Bibliography**

180

- 181 1. Anasetti, C. *et al.* Peripheral-blood stem cells versus bone marrow from unrelated donors. *N.*  
182 *Engl. J. Med.* **367**, 1487–1496 (2012).
- 183 2. Davies, S. M. *et al.* Engraftment and survival after unrelated-donor bone marrow transplantation:  
184 a report from the national marrow donor program. *Blood* **96**, 4096–4102 (2000).
- 185 3. Gyurkocza, B. & Sandmaier, B. M. Conditioning regimens for hematopoietic cell  
186 transplantation: one size does not fit all. *Blood* **124**, 344–353 (2014).
- 187 4. Bacigalupo, A. *et al.* Defining the intensity of conditioning regimens: working definitions. *Biol.*  
188 *Blood Marrow Transplant.* **15**, 1628–1633 (2009).
- 189 5. Ladinsky, M. S. *et al.* Endocytosis of commensal antigens by intestinal epithelial cells regulates  
190 mucosal T cell homeostasis. *Science* **363**, (2019).
- 191 6. Balmer, M. L. *et al.* Microbiota-derived compounds drive steady-state granulopoiesis via  
192 MyD88/TICAM signaling. *J. Immunol.* **193**, 5273–5283 (2014).
- 193 7. Yoshii, K., Hosomi, K., Sawane, K. & Kunisawa, J. Metabolism of dietary and microbial vitamin  
194 B family in the regulation of host immunity. *Front. Nutr.* **6**, 48 (2019).
- 195 8. Zaza, G. *et al.* Impact of maintenance immunosuppressive therapy on the fecal microbiome of  
196 renal transplant recipients: Comparison between an everolimus- and a standard tacrolimus-based  
197 regimen. *PLoS One* **12**, e0178228 (2017).
- 198 9. Hall, M. W. *et al.* Inter-personal diversity and temporal dynamics of dental, tongue, and salivary  
199 microbiota in the healthy oral cavity. *npj Biofilms and Microbiomes* **3**, 2 (2017).
- 200 10. Ramanan, P., Barreto, J. N., Osmon, D. R. & Tosh, P. K. *Rothia* bacteremia: a 10-year  
201 experience at Mayo Clinic, Rochester, Minnesota. *J. Clin. Microbiol.* **52**, 3184–3189 (2014).
- 202 11. Ulven, T. Short-chain free fatty acid receptors FFA2/GPR43 and FFA3/GPR41 as new potential  
203 therapeutic targets. *Front. Endocrinol. (Lausanne)* **3**, 111 (2012).
- 204 12. Smith, P. M. *et al.* The microbial metabolites, short-chain fatty acids, regulate colonic Treg cell  
205 homeostasis. *Science* **341**, 569–573 (2013).
- 206 13. Foster, K. R., Schluter, J., Coyte, K. Z. & Rakoff-Nahoum, S. The evolution of the host  
207 microbiome as an ecosystem on a leash. *Nature* **548**, 43–51 (2017).
- 208
